# Supplementary material
Source: publisher site journal article supplement (https://www.spandidos-publications.com/3795/downloadSupplementary)
Supplement: Supplementary file 1 [file downloadSupplementary]

Table SI. Relative IL-2p::Jurkat cell viability when exposed to the chemicals at the indicated concentrations. These values were used to calculate the chemical concentration for 90% cell viability 90 as shown in Table I.

| A, DNCB                         |                            |
|---------------------------------|----------------------------|
| Concentration, $\mu\text{g/ml}$ | Relative cell viability, % |
| 1.67                            | 45.9                       |
| 1.33                            | 78.5                       |
| 1.11                            | 88                         |
| 0.83                            | 102                        |

| B, $\text{NiSO}_4$              |                            |
|---------------------------------|----------------------------|
| Concentration, $\mu\text{g/ml}$ | Relative cell viability, % |
| 166.7                           | 35.8                       |
| 83.3                            | 47.5                       |
| 41.7                            | 85.1                       |
| 20.8                            | 93                         |

| C, Isoeugenol                   |                            |
|---------------------------------|----------------------------|
| Concentration, $\mu\text{g/ml}$ | Relative cell viability, % |
| 100                             | 83.3                       |
| 66.7                            | 99                         |
| 50                              | 101.9                      |
| 33.3                            | 94.3                       |

| D, Diethylenetriamine           |                            |
|---------------------------------|----------------------------|
| Concentration, $\mu\text{g/ml}$ | Relative cell viability, % |
| 1,200                           | 64.1                       |
| 800                             | 83.1                       |
| 600                             | 101.2                      |

| E, Glyoxal                      |                            |
|---------------------------------|----------------------------|
| Concentration, $\mu\text{g/ml}$ | Relative cell viability, % |
| 60                              | 43.3                       |
| 30                              | 90.4                       |
| 15                              | 94.6                       |
| 6.7                             | 108.3                      |

| F, Benzyl benzoate              |                            |
|---------------------------------|----------------------------|
| Concentration, $\mu\text{g/ml}$ | Relative cell viability, % |
| 300                             | 88.5                       |
| 200                             | 95.9                       |
| 150                             | 115.4                      |
| 100                             | 104.6                      |

| G, Lactic acid                  |                            |
|---------------------------------|----------------------------|
| Concentration, $\mu\text{g/ml}$ | Relative cell viability, % |
| 1,556                           | 60.9                       |
| 777.7                           | 139.3                      |
| 389                             | 130.6                      |
